# Supplementary material for: Emma Stone: "Hollywood es como un gran instituto"
Source: publisher site journal article supplement (doi:10.1515/cclm-2014-0959), 2010-01-01

**Supplemental Data Table 1.** Readable formats are an e-mail embedded table, Excel-files, and text-files.

**e-mail embedded table**

From: \*\*\*

Sent: Saturday, 28 september 2013 06:31

To: percentile@stt-consulting.com

Content: Empower Percentile Project

Time produced : 27-09-2013 00:00 - 27-09-2013 23:59

ABCDEF;27/09/2013;C16000-5;POL;NA;mmol/L;140.9

ABCDEF;27/09/2013;C16000-6;POL;NA;mmol/L;139.4

ABCDEF;27/09/2013;C16000-5;POL;K;mmol/L;4.61

**EXCEL attachment to e-mail**

From: \*\*\*

Sent: Wednesday, 13 november 2013 06:18

To: percentile@stt-consulting.com

Content: Empower Percentile Project

Time produced : 12-11-2013 00:00 - 12-11-2013 23:59

Filename: Empower Percentile.xlsx (or xls)

|        |            |             |   |       |        |       |
|--------|------------|-------------|---|-------|--------|-------|
| ABCDEF | 12/11/2013 | VITROS5.1FS | E | Alb   | g/L    | 42.2  |
| ABCDEF | 12/11/2013 | VITROS5.1FS | E | APase | U/L    | 91.5  |
| ABCDEF | 12/11/2013 | VITROS5.1FS | E | Ca    | mmol/L | 2.355 |

**Text attachment to e-mail**

From: \*\*\*

Sent: Saturday, 28 september 2013 06:31

To: percentile@stt-consulting.com

Content: Empower Percentile Project

Time produced : 27-09-2013 00:00 - 27-09-2013 23:59

Filename: Empower Percentile.txt

ABCDEF;27/09/2013;80\_AU5822;POL;ALB;g/dl;3.0

ABCDEF;27/09/2013;80\_AU5822;POL;CA;mmol/l;2.125

ABCDEF;27/09/2013;80\_AU5822;POL;NA;mmol/l;140.1

**Supplemental Data Table 2.** Preliminary mid- to long-term bias limits used in “The Percentiler”.

| Analyte                    | Limit | Unit   |
|----------------------------|-------|--------|
| Albumin                    | 1     | g/L    |
| Alkaline phosphatase       | 5     | U/L    |
| Alanine aminotransferase   | 2     | U/L    |
| Aspartate aminotransferase | 1     | U/L    |
| Calcium                    | 0.05  | mmol/L |
| Chloride                   | 1     | mmol/L |
| Creatinine                 | 3     | μmol/L |
| C-reactive protein         | 0.2   | mg/L   |
| Gamma-glutamyl transferase | 2     | U/L    |
| Glucose                    | 0.2   | mmol/L |
| Inorganic phosphor         | 0.04  | mmol/L |
| Lactate dehydrogenase      | 10    | U/L    |
| Magnesium                  | 0.03  | mmol/L |
| Potassium                  | 0.15  | mmol/L |
| Sodium                     | 1     | mmol/L |
| Total-bilirubin            | 1     | μmol/L |
| Total-cholesterol          | 0.2   | mmol/L |
| Total-protein              | 1     | g/L    |
| Urea                       | 0.3   | mmol/L |
| Uric acid (urate)          | 15    | μmol/L |

Note: The actually chosen numbers for the bias limits are “tailored” to the used SI-units; e.g., for albumin 1 g/L. This allows us to show the limits in the user interface as so-called stability limits that should not be exceeded by longer than 1 week (see, for example, Figure 2A for ALT in the main text). To appreciate how these absolute limits compare with the bias limits inferred from biological variation, the 1 g/L for albumin can be expressed relatively (in %) to our project’s typical median concentration of 43 g/L), i.e. 2.3% versus 1.3% for the limit derived from biological variation. This 2.3% is what we call a “state-of-the-art” limit mirrored to the biological variation limit.

**Supplemental Data Figure 1.** A screenshot of “The Percentiler”.

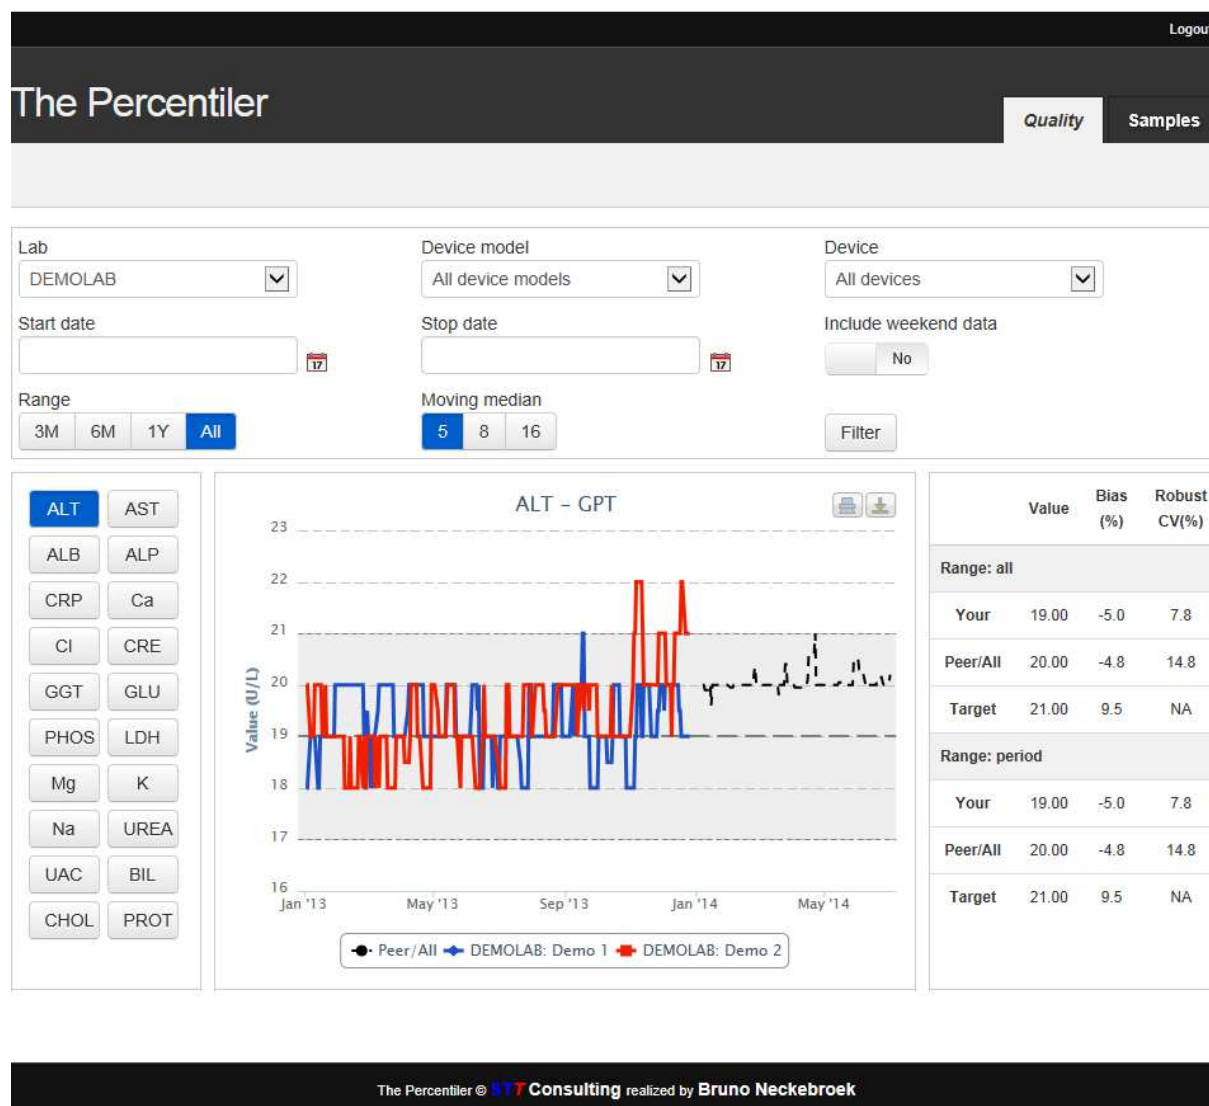

**Supplemental Data Figure 2.** Global distribution of the participants in the 2014 survey of the master comparisons (top) and patient percentile monitoring (bottom).

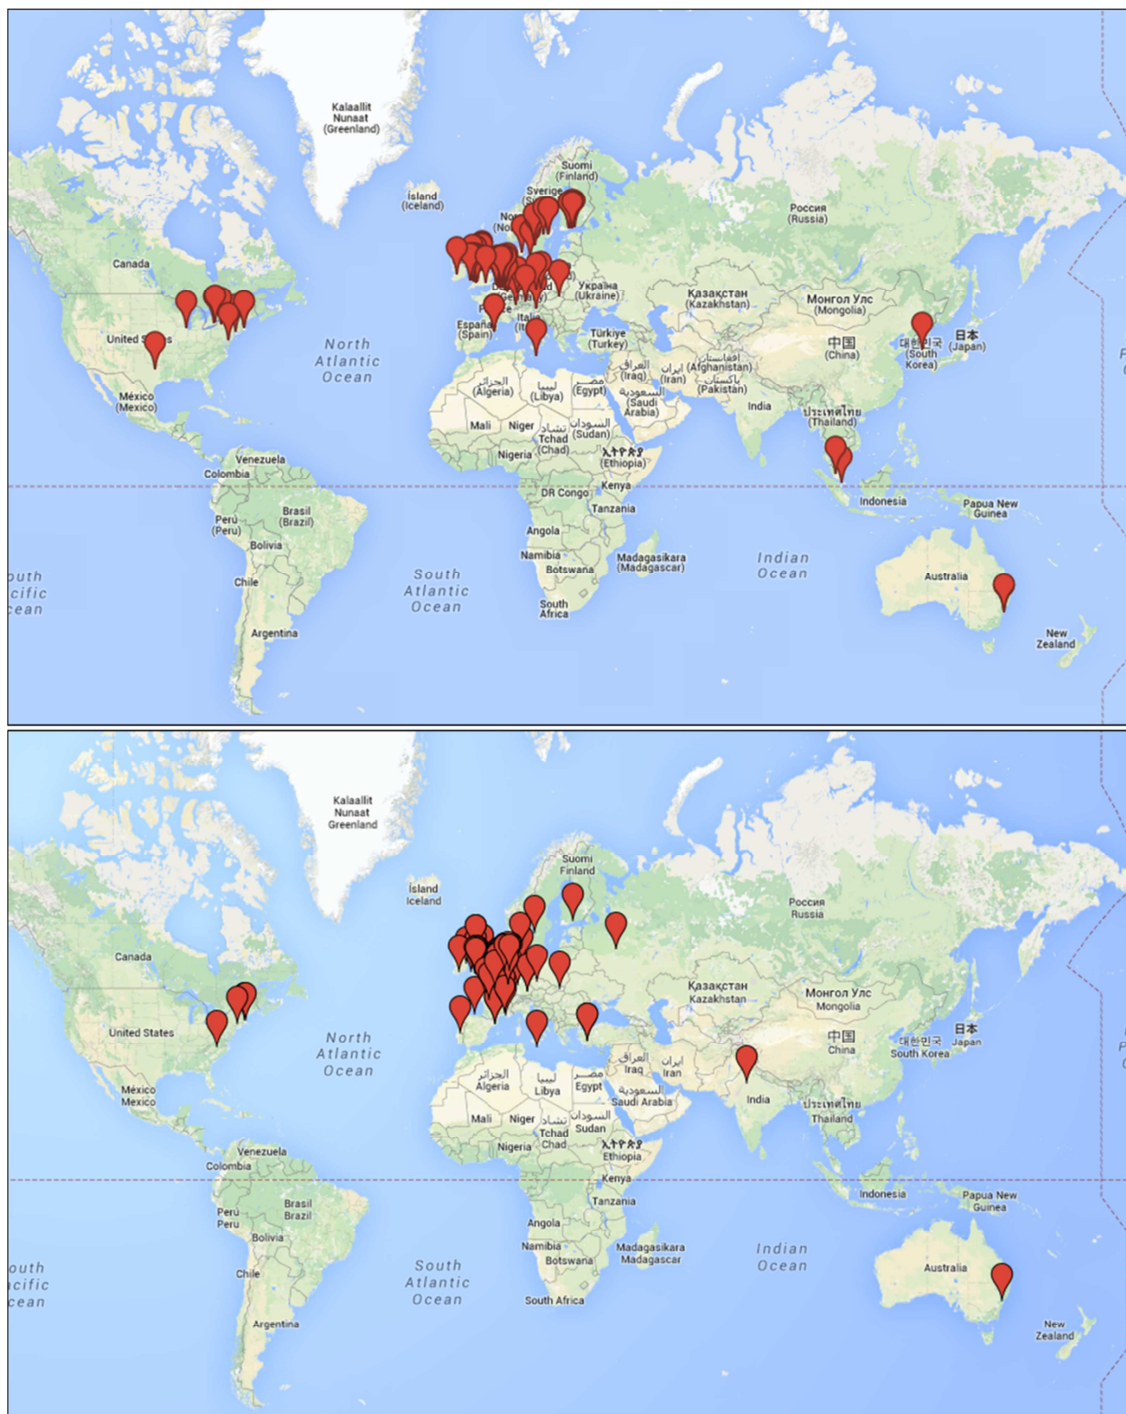

**Supplemental Data Table 3.** Number of laboratories participating in the 2014 survey of the master comparisons and number of instruments represented in the patient percentile monitoring part of the Empower project.

| Manufacturer                            | Device Type | 2014 master comparisons | Patient percentile monitoring |
|-----------------------------------------|-------------|-------------------------|-------------------------------|
| Abbott                                  | Architect   | 21                      | 19                            |
| Beckman Coulter                         | AU          | 19                      | 12                            |
|                                         | Synchron    | 11                      | 12                            |
| Ortho                                   | Vitros      | 19                      | 22                            |
| Roche                                   | Cobas       | 26                      | 91                            |
|                                         | Integra     | -                       | 3                             |
|                                         | Modular     | 9                       | 11                            |
| Siemens                                 | Advia       | 12                      | 7                             |
|                                         | Vista       | 8                       | 5                             |
| <b>Total (laboratories/instruments)</b> |             | <b>125</b>              | <b>182</b>                    |

**Supplemental Data Figure 3.** Patient percentile monitoring: (A) example of stable performance with low patient population variation and good concordance between different instruments in one laboratory mainly working with primary care practitioners (samples almost exclusively from outpatients); note, the profile is similar for nearly all other analytes; (B) example of a laboratory with higher performance variation due to a higher patient population variation (moving median from  $n = 5$  daily medians), however, with a moving median tailored to  $n = 16$  (C) the effect of population variation can partly be suppressed.

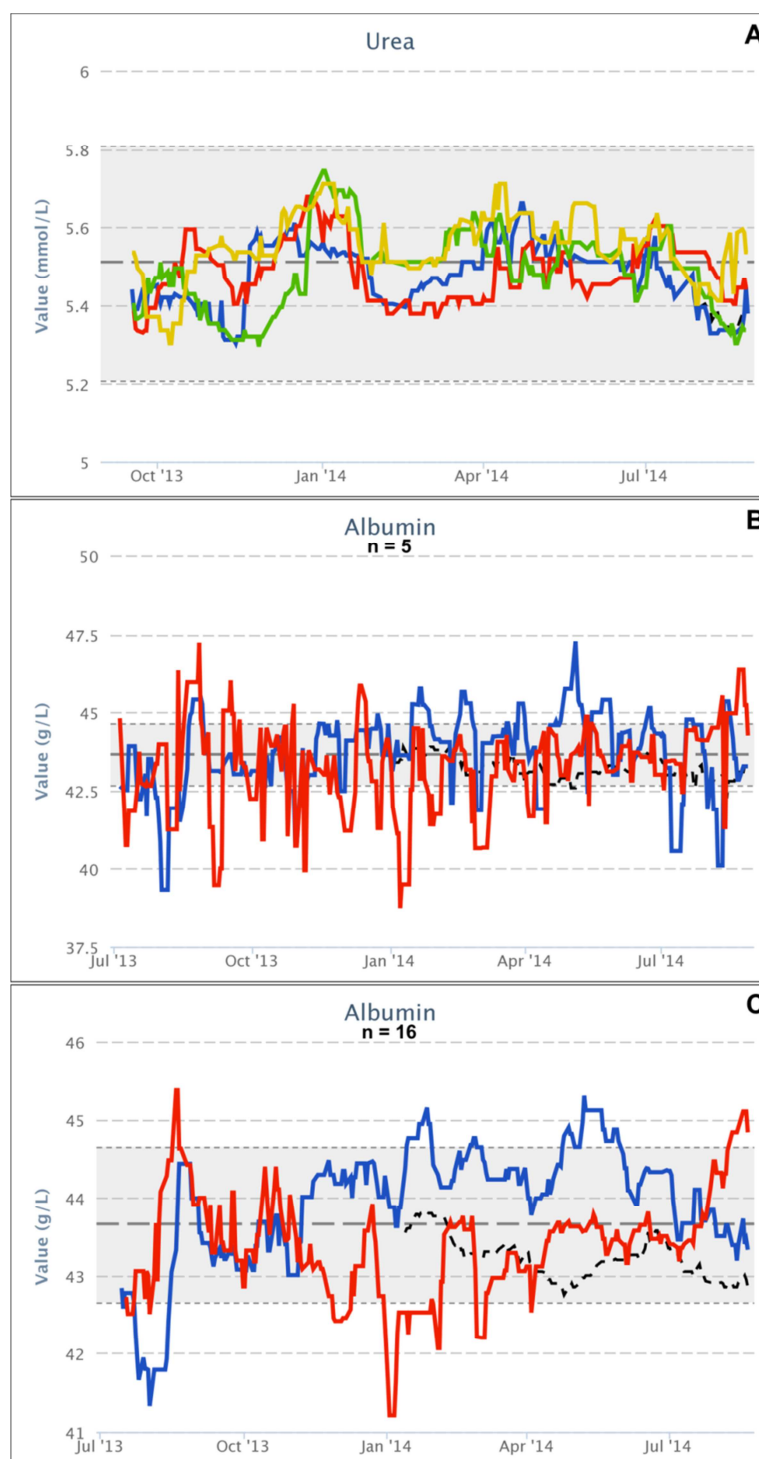

Supplement: Supplementary file 1 [file cclm-2014-0959_R1_Publication_Empower-supplement.pdf]
